# Supplementary material for: Optimized Lambda Exonuclease Digestion or Purification Using Streptavidin-Coated Beads: Which One Is Best for Successful DNA Aptamer Selection?
Source: MDPI journal article supplement (doi:10.3390/mps5060089), 2022-10-29
Supplement: s1 [file s1]

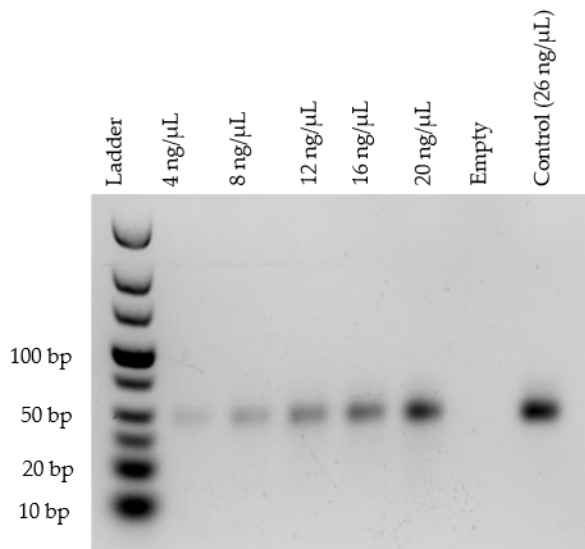

(a)

|                                  |         |
|----------------------------------|---------|
| a                                | 1731,9  |
| b                                | -6005,9 |
| Concentration of control (ng/μL) | 26,07   |

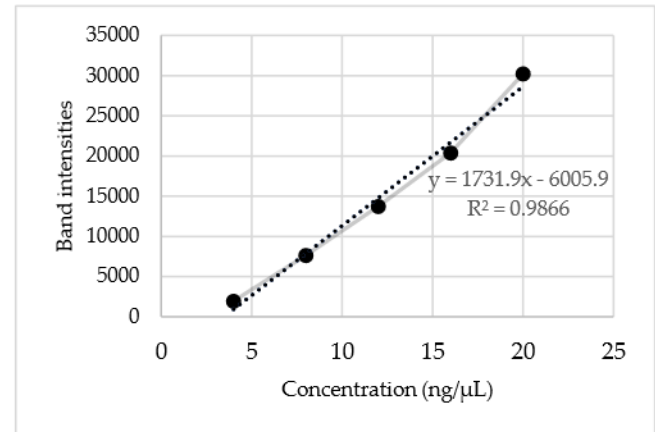

(b)

**Figure S1:** Quantification of the control (library), using gel-based quantification. (a): Agarose gel analysis of the concentration range of the library. Products were revealed on a 4% agarose gel at 90 V for 2h (TAE 1X, GelRed®). (b): Confirmation of the control concentration using the correlation curve between band intensities (ImageJ software) and the concentration range.

**Table S1:** Average ssDNA concentration (ng/μL) obtained after purification using streptavidin-coated beads or lambda exonuclease digestion, before or after ethanol precipitation/ phenol-chloroform extraction.

| Quantification techniques | Purification of ssDNA using |                                   |                                          |                              |                                   |                                          |
|---------------------------|-----------------------------|-----------------------------------|------------------------------------------|------------------------------|-----------------------------------|------------------------------------------|
|                           | Streptavidin-coated beads   |                                   |                                          | Lambda exonuclease digestion |                                   |                                          |
|                           | Before purification (n=10)  | After ethanol precipitation (n=5) | After phenol chloroform extraction (n=5) | Before purification (n=10)   | After ethanol precipitation (n=5) | After phenol chloroform extraction (n=5) |
| Qubit                     | NA                          | 3.7 ± 0.41                        | 3.84 ± 0.35                              | NA                           | 4.48 ± 0.56                       | 5.16 ± 0.65                              |
| Nanodrop™                 | NA                          | 9.14 ± 0.53                       | 9.88 ± 0.78                              | NA                           | 16.2 ± 0.43                       | 17.5 ± 0.73                              |
| Gel-based quantification  | 8.8 ± 0.38                  | 6.86 ± 0.62                       | 7.94 ± 0.52                              | 14.8 ± 0.29                  | 11.6 ± 0.56                       | 11.3 ± 0.75                              |

**Table S2:** Average ssDNA recovery (%) obtained after purification using streptavidin-coated beads or lambda exonuclease digestion, before or after ethanol precipitation/ phenol-chloroform extraction.

| Quantification techniques               | Purification of ssDNA using |                                   |                                          |                              |                                   |                                          |
|-----------------------------------------|-----------------------------|-----------------------------------|------------------------------------------|------------------------------|-----------------------------------|------------------------------------------|
|                                         | Streptavidin-coated beads   |                                   |                                          | Lambda exonuclease digestion |                                   |                                          |
|                                         | Before purification (n=10)  | After ethanol precipitation (n=5) | After phenol chloroform extraction (n=5) | Before purification (n=10)   | After ethanol precipitation (n=5) | After phenol chloroform extraction (n=5) |
| Qubit                                   | NA                          | 18.5 ± 3.4                        | 19.2 ± 2.0                               | NA                           | 22.4 ± 2.5                        | 25.8 ± 3.0                               |
| Nanodrop™                               | NA                          | 45.7 ± 3.1                        | 49.4 ± 5.7                               | NA                           | 81.2 ± 7.8                        | 87.5 ± 5.6                               |
| Gel-based quantification                | 44 ± 5.8                    | 34.3 ± 6.4                        | 39.7 ± 1.8                               | 74 ± 9.3                     | 58.1 ± 3.9                        | 56.6 ± 6.0                               |
| Comparison of quantification techniques | Qubit/Nanodrop              | < 0.001                           | < 0.001                                  | Qubit/Nanodrop               | < 0.001                           | < 0.001                                  |
|                                         | Qubit/Gel                   | < 0.001                           | < 0.001                                  | Qubit/Gel                    | < 0.001                           | < 0.001                                  |
| Student's <i>t</i> -test                | Nanodrop/Gel                | < 0.01                            | < 0.01                                   | Nanodrop/Gel                 | < 0.01                            | < 0.01                                   |

\*SD is expressed in %. The ssDNA quantification techniques were compared in a peer comparison by Student's statistical test. The differences in yields obtained between Qubit, Nanodrop™ and gel-based quantification were statistically significant, with values ranging from significant ( $p < 0.01$ ) to highly significant ( $p < 0.001$ ), depending on the techniques compared.
